# Supplementary material for: Multi-Stage Transcriptome Analysis Revealed the Growth Mechanism of Feathers and Hair Follicles during Induction Molting by Fasting in the Late Stage of Egg Laying
Source: MDPI journal article supplement (doi:10.3390/biology12101345), 2023-10-19
Supplement: s1 [file s1]

**Table S1.** RNA-Seq quality control result.

| Sample | RawDatas | CleanData(%)      | Adapter(%)    | LowQuality(%)  | Q20(%) | Q30(%) | N(%)  | GC(%)  |
|--------|----------|-------------------|---------------|----------------|--------|--------|-------|--------|
| F0-1   | 37922294 | 37586978 (99.12%) | 40028 (0.11%) | 295288 (0.78%) | 97.45% | 92.99% | 0.00% | 48.49% |
| F0-2   | 42962174 | 42641178 (99.25%) | 23932 (0.06%) | 292010 (0.68%) | 97.66% | 93.50% | 0.00% | 48.35% |
| F0-3   | 51184048 | 50824572 (99.30%) | 26030 (0.05%) | 327088 (0.64%) | 97.87% | 94.01% | 0.00% | 48.78% |
| F15-1  | 48341388 | 47952960 (99.20%) | 28676 (0.06%) | 353896 (0.73%) | 97.52% | 93.16% | 0.00% | 49.01% |
| F15-2  | 51604866 | 51238376 (99.29%) | 26912 (0.05%) | 333560 (0.65%) | 97.78% | 93.73% | 0.00% | 48.79% |
| F15-3  | 45635536 | 45310194 (99.29%) | 28458 (0.06%) | 291612 (0.64%) | 97.86% | 93.92% | 0.00% | 48.92% |
| R5-1   | 47764930 | 47431546 (99.30%) | 25252 (0.05%) | 302504 (0.63%) | 97.74% | 93.67% | 0.00% | 48.88% |
| R5-2   | 53110862 | 52726336 (99.28%) | 32776 (0.06%) | 345214 (0.65%) | 97.70% | 93.59% | 0.00% | 49.19% |
| R5-3   | 44682424 | 44371746 (99.30%) | 26324 (0.06%) | 279064 (0.62%) | 97.65% | 93.47% | 0.00% | 49.28% |
| R32-1  | 44375150 | 44076610 (99.33%) | 26426 (0.06%) | 266204 (0.60%) | 97.60% | 93.30% | 0.00% | 49.42% |
| R32-2  | 40707226 | 40320306 (99.05%) | 47662 (0.12%) | 338672 (0.83%) | 97.37% | 92.88% | 0.00% | 49.56% |
| R32-3  | 37860616 | 37498374 (99.04%) | 43930 (0.12%) | 317818 (0.84%) | 97.50% | 93.22% | 0.00% | 50.53% |

**Table S2.** Results table of different genes for each group (first 10 rows).

| Group     | ID                 | Symbol   | log2(FC)    | P-Value     | FDR         |
|-----------|--------------------|----------|-------------|-------------|-------------|
| F0-VS-F15 | MSTRG.13499        | ZP1      | -5.5502     | 1.25E-27    | 2.05E-23    |
|           | ENSGALG00000017394 | INSIG1   | -1.3555     | 6.75E-19    | 5.54E-15    |
|           | ENSGALG00000029308 | PNPLA3   | -1.8128     | 3.68E-14    | 2.01E-10    |
|           | ENSGALG00000001331 | ST14     | -1.6602     | 2.47E-13    | 1.01E-09    |
|           | ENSGALG00000048920 | --       | -4.5634     | 7.39E-13    | 2.43E-09    |
|           | ENSGALG00000001857 | C1QTNF12 | -2.9977     | 8.17E-11    | 2.23E-07    |
|           | ENSGALG00000003078 | MMD      | -1.7249     | 3.29E-10    | 6.97E-07    |
|           | ENSGALG00000052022 | --       | -3.9734     | 3.40E-10    | 6.97E-07    |
|           | ENSGALG00000041491 | ACKR4    | -2.0856     | 1.01E-09    | 1.85E-06    |
|           | MSTRG.14534        | --       | -1.4638     | 1.50E-09    | 2.46E-06    |
|           | ENSGALG00000012790 | DSP      | 0.714813076 | 0.004742914 | 0.120668547 |
|           | ENSGALG00000000608 | CDH1     | 1.536775734 | 0.008355285 | 0.158073707 |
|           | ENSGALG00000000299 | PKP1     | 0.869955313 | 0.059873646 | 0.380035396 |
| F0-VS-R5  | ENSGALG00000005541 | GJB1     | -4.17094    | 1.72E-68    | 2.84E-64    |
|           | ENSGALG00000004519 | TRPV2    | -1.84631    | 3.13E-47    | 2.58E-43    |
|           | MSTRG.13499        | ZP1      | -5.76074    | 1.50E-35    | 8.22E-32    |
|           | ENSGALG00000010476 | BNIP3    | -1.48534    | 4.20E-29    | 1.73E-25    |
|           | MSTRG.14534        | --       | -1.79749    | 1.38E-27    | 4.55E-24    |
|           | ENSGALG00000041257 | ACVR1C   | -2.42159    | 1.84E-26    | 5.05E-23    |

|            |                    |          |             |             |             |
|------------|--------------------|----------|-------------|-------------|-------------|
|            | ENSGALG00000002421 | FAM213A  | -1.94159    | 1.26E-24    | 2.97E-21    |
|            | ENSGALG00000005553 | NLGN3    | -1.42384    | 2.55E-23    | 5.26E-20    |
|            | ENSGALG00000009700 | PKP4     | -4.23715    | 3.87E-22    | 7.08E-19    |
|            | MSTRG.8206         | --       | -1.45148    | 5.37E-21    | 8.84E-18    |
|            | ENSGALG00000012790 | DSP      | 1.134127581 | 0.002999347 | 0.050846954 |
|            | ENSGALG00000000608 | CDH1     | 1.462441393 | 0.00656066  | 0.084789455 |
|            | ENSGALG00000000299 | PKP1     | 1.522322649 | 0.001920788 | 0.037769743 |
| F0-VS-R32  | ENSGALG00000009724 | GREM1    | -3.29616    | 1.24E-20    | 2.03E-16    |
|            | ENSGALG00000013057 | USP18    | -1.98614    | 1.24E-19    | 1.02E-15    |
|            | ENSGALG00000012873 | SERPINB5 | 1.859907    | 1.00E-17    | 5.47E-14    |
|            | ENSGALG00000010866 | AREG     | 1.998151    | 6.21E-17    | 2.55E-13    |
|            | ENSGALG00000017040 | C4       | -2.01371    | 1.07E-16    | 3.51E-13    |
|            | ENSGALG00000051882 | MUC4     | 5.077869    | 4.73E-16    | 1.29E-12    |
|            | ENSGALG00000015345 | CRYBG1   | 2.668477    | 5.74E-16    | 1.34E-12    |
|            | ENSGALG00000054252 | TM4SF1   | 5.933619    | 2.88E-15    | 5.92E-12    |
|            | ENSGALG00000037011 | CILP2    | 3.085276    | 7.31E-14    | 1.33E-10    |
|            | ENSGALG00000046632 | --       | 1.751577    | 1.04E-13    | 1.71E-10    |
|            | ENSGALG00000012790 | DSP      | 2.312326731 | 5.08E-12    | 4.63E-09    |
|            | ENSGALG00000000608 | CDH1     | 2.485873645 | 1.18E-07    | 1.98E-05    |
|            | ENSGALG00000000299 | PKP1     | 2.430335865 | 5.12E-08    | 1.02E-05    |
|            |                    |          |             |             |             |
| F15-VS-R5  | ENSGALG00000029308 | PNPLA3   | 2.811057    | 4.08E-42    | 6.73E-38    |
|            | ENSGALG00000007114 | APOA1    | -2.77026    | 7.27E-26    | 5.99E-22    |
|            | ENSGALG00000048409 | TXNIP    | -1.56208    | 3.10E-19    | 1.71E-15    |
|            | ENSGALG00000049450 | IGLC1    | 2.718289    | 5.90E-16    | 2.43E-12    |
|            | ENSGALG00000041926 | HEXIM1   | -1.31622    | 2.12E-15    | 7.01E-12    |
|            | ENSGALG00000037943 | PRKCB    | 1.941684    | 1.19E-14    | 3.26E-11    |
|            | ENSGALG00000048920 | --       | 5.024988    | 1.75E-14    | 4.13E-11    |
|            | ENSGALG00000052022 | --       | 4.498031    | 6.75E-14    | 1.39E-10    |
|            | ENSGALG00000012006 | RTN1     | -1.17164    | 1.52E-13    | 2.78E-10    |
|            | ENSGALG00000050515 | IGHA1    | 2.462235    | 2.90E-13    | 4.78E-10    |
|            | ENSGALG00000000299 | PKP1     | 0.652367336 | 0.133604024 | 0.522936233 |
| F15-VS-R32 | ENSGALG00000055004 | --       | 6.83919     | 3.37E-35    | 5.54E-31    |
|            | ENSGALG00000004804 | TGM3     | 4.889517    | 1.90E-24    | 1.57E-20    |
|            | ENSGALG00000054020 | --       | 9.650214    | 1.29E-23    | 7.07E-20    |
|            | MSTRG.13499        | ZP1      | 4.798641    | 2.21E-22    | 9.10E-19    |
|            | ENSGALG00000025872 | TGM6     | 3.470953    | 4.24E-20    | 1.40E-16    |
|            | MSTRG.8963         | --       | 5.979878    | 2.00E-19    | 5.47E-16    |
|            | MSTRG.8962         | --       | 5.93466     | 3.76E-19    | 8.84E-16    |
|            | ENSGALG00000050822 | --       | 3.646558    | 1.08E-17    | 2.21E-14    |
|            | ENSGALG00000048920 | --       | 5.323816    | 5.20E-16    | 9.51E-13    |
|            | ENSGALG00000044307 | PLA2G4E  | 4.627306    | 1.12E-15    | 1.84E-12    |

|           |                        |       |              |             |             |
|-----------|------------------------|-------|--------------|-------------|-------------|
|           | ENSGALG00000012790     | DSP   | 1.597513655  | 1.71E-06    | 0.000370254 |
|           | ENSGALG00000039985CDH1 | CDH1  | -0.659903042 | 0.010198072 | 0.190429606 |
|           | ENSGALG00000000299     | PKP1  | 1.560380552  | 0.000101556 | 0.009030825 |
| R5-VS-R32 | MSTRG.13499            | ZP1   | 5.009159     | 5.54E-28    | 9.14E-24    |
|           | ENSGALG00000007511     | ITGB2 | -1.71765     | 2.27E-24    | 1.87E-20    |
|           | ENSGALG000000035818    | --    | 5.931713     | 5.61E-24    | 3.09E-20    |
|           | ENSGALG000000027874    | CHAC1 | 3.892139     | 1.21E-20    | 4.98E-17    |
|           | ENSGALG000000043909    | --    | -5.32043     | 3.98E-20    | 1.31E-16    |
|           | ENSGALG000000042148    | FKBP5 | 2.490048     | 4.17E-19    | 1.15E-15    |
|           | ENSGALG000000015419    | PENK  | -4.26115     | 3.57E-16    | 8.41E-13    |
|           | ENSGALG000000050893    | CCR2  | -1.95589     | 5.83E-15    | 1.20E-11    |
|           | ENSGALG000000001571    | MYO1F | -1.64806     | 8.17E-15    | 1.50E-11    |
|           | ENSGALG000000005725    | CSF1R | -1.22459     | 1.13E-13    | 1.77E-10    |
|           | ENSGALG000000012790    | DSP   | 1.17819915   | 0.001457466 | 0.041279949 |
|           | ENSGALG000000000608    | CDH1  | 1.023432251  | 0.018019582 | 0.224257868 |
|           | ENSGALG000000000299    | PKP1  | 0.908013217  | 0.022645743 | 0.256449977 |

Note: in the table, the *DSP*, *CDH1*, and *PKP1* are placed, along with the first ten genes in each group.
